# Supplementary material for: Spatial Characteristics of the Efflux Pump MexB Determine Inhibitor Binding
Source: PubMed Central journal article supplement (PMC9664856; doi:10.1128/aac.00672-22), 2022-10-27
Supplement: aac.00672-22-s0001.pdf [file aac.00672-22-s0001.pdf]

## SUPPLEMENTARY INFORMATION

### Spatial characteristics of the efflux pump MexB determine inhibitor binding

Seiji Yamasaki<sup>a,b,c</sup>, Naoki Koga<sup>b</sup>, Martijn Zwama<sup>c</sup>, Keisuke Sakurai<sup>c,e</sup>, Ryosuke Nakashima<sup>c</sup>, Akihito Yamaguchi<sup>c</sup>, and Kunihiko Nishino<sup>b,c,d\*</sup>

<sup>a</sup>Institute for Advanced Co-Creation Studies, Ibaraki, Osaka 567-0047, Japan

<sup>b</sup>Graduate School of Pharmaceutical Sciences, Osaka University, Suita, Osaka 565-0871, Japan

<sup>c</sup>SANKEN (The Institute of Scientific and Industrial Research), Osaka University, Ibaraki, Osaka 567-0047, Japan

<sup>d</sup>Center for Infectious Disease Education and Research, Osaka University, Suita, Japan

<sup>e</sup>Present address. Institute for Protein Research, Osaka University, Suita, Osaka 565-0871, Japan

### Supplementary Materials

Supplementary Figure 1. Alignment of *E. coli* AcrB and *P. aeruginosa* MexB.

Supplementary Figure 2. Growth of *Escherichia coli* cells in the presence of various concentrations of ABI-PP without antibiotics

Supplementary Figure 3. Growth of *Escherichia coli* cells in the presence of 0.016 µg/mL of levofloxacin and various concentrations of ABI-PP

Supplementary Figure 4. Growth of *Escherichia coli* cells in the presence of 0.125 µg/mL of aztreonam and various concentrations of ABI-PP

|      |     |                                                               |      |
|------|-----|---------------------------------------------------------------|------|
| MexB | 1   | MSKFFIDRPIFAWVIALVIMLAGGLSILSLPVNQYPAIAPPAIAVQVSYPGASAETVQDT  | 60   |
| AcrB | 1   | M FFIDRPIFAWVIA++IMLAGGL+IL LPV QYP IAPPA+ + SYPGA A+TVQDT    | 60   |
| MexB | 61  | VVQVIEQQMNGIDNLRYSSESNSDGSMTITVTFEQGTDPDIAQVQVQNKQLQATPLLPQ   | 120  |
| AcrB | 61  | V QVIEQ MNGIDNL Y+SS S+S G++ IT+TFE GTD DIAQVQVQNKQLA PLLPQ   | 120  |
| MexB | 121 | EVQRQIRVTKAVKNFLMVGVSVDGSMTKEDLSNYIVSNIQDPLSRTKGVGDFQVFGS     | 180  |
| AcrB | 121 | +FLMVGVS++TDG+MT+ED+S+Y+ +N++D +SRT GVG D Q+FGS               | 180  |
| MexB | 181 | QYSMRIWLDPAKLNYSYQLTPGDVSSAIAQNVQISSGQLGGLPAVKGQQLNATIIGKTRL  | 240  |
| AcrB | 181 | QY+MRIW++P +LN +QLTP DV +AI+AQN Q+++GQLGG P VKGQQLNA+II +TRL  | 240  |
| MexB | 241 | QTAEQFENILLKVNPDGQVRLKDVADVGLGGQDYSINAQFNGSPASGIAIKLATGANAL   | 300  |
| AcrB | 241 | + E+F ILLKVN DGS+V L+DVA + LGG+++ I A+FNG PASG+ IKLATGANAL    | 300  |
| MexB | 301 | DTAKAIRQTIANLEPFMPQGMKVVPYDTPPVVSASIEHVVKTLGEAILLVFLVMYFLQ    | 360  |
| AcrB | 301 | DTAAAIRAELAKMEPFFPSGLKIVYPYDTPFVKISIEHVVKTLVEAILLVFLVMYFLQ    | 360  |
| MexB | 361 | NFRATLIPTIAVPVLLGTGFLAAFGFSINTLTMFGMVAIGLLVDDAIVVVENVERVM     | 420  |
| AcrB | 361 | NFRATLIPTIAVPVLLGTGFLAAFGFSINTLTMFGMVAIGLLVDDAIVVVENVERVM     | 420  |
| MexB | 421 | AEEGLSPREARKSMGQIQGALVGIAMVLSAVFLPMAFFGGSTGVYIRQFSITIVSAMAL   | 480  |
| AcrB | 421 | AEEGL P+EA RKSMGQIQGALVGIAMVLSAVF+PMAFFGGSTG IYRQFSITIVSAMAL  | 480  |
| MexB | 481 | SIVALILTPALCATMLKPIEKGDHGEHKAGFFGWFNRMFLSTTHGYERGVASILKHRAP   | 540  |
| AcrB | 481 | SV+VALILTPALCATMLKPI KGDHGE K GFFGWFNRMF +TH Y V IL+          | 540  |
| MexB | 541 | YLLIYVVIVAGMIWMFTRIPTAFLPDEDQGVLFQVQTPPGSSAERTQVVVDSMREYLLE   | 600  |
| AcrB | 541 | YL++Y++IV GM ++F R+P++FLPDEDQGV VQ P G++ ERTQ V++ + Y L       | 600  |
| MexB | 601 | KESSSVSVFTVTGFGFAGRGQSSGMAFIMLKPWEERPGENSVFELAKRAQMHHFSFKD    | 660  |
| AcrB | 601 | KE++V SVF V GF FAGRGQ++G+AF+ LK W +RPG EN V + RA F KD         | 660  |
| MexB | 661 | AMVFAFAPPVLELGNATGFDLFLQDQAGVGEVLLQARNKFLMLAAQNP-ALQVRPENG    | 719  |
| AcrB | 661 | AMVFAF P+++ELG ATGFD L DQAG+GHE L QARN+ L AA++P L VRPENG      | 720  |
| MexB | 720 | MSDEPQYKLEIDDEKASALGVSLADINSTVSIAWGSSYVNDFIDRGRVKRYVQGRPDAR   | 779  |
| AcrB | 721 | + D PQ+K++ID EKA ALGVS+ DIN+T+ AWG SYVNDFIDRGRVK+VY+ R        | 780  |
| MexB | 780 | MNPDDLSKWWYVRNDKGMVFPNFAFATGKWEYGSPLKERYNGVPAMEILGEPAPGLSSGDA | 839  |
| AcrB | 781 | M PDD+ WYVR G+MVPF+AF++ +WEYGS+LERYNG+P+MEILG+ APG S+G+A      | 840  |
| MexB | 840 | MAAVEEIVKQLPKGVGYSWTGLSYEERLSGSQAPALYALSLLVFLCLAALYESWSIPFS   | 899  |
| AcrB | 841 | M +E++ +LP GVG Y WTG+SY+ERLSG+QAP+LYA+SL+VFLCLAALYESWSIPFS    | 900  |
| MexB | 900 | VMLVVPLGVIGALLATSMRGLSNDVFFQVGLLTTIGLSAKNAILIVEFAKEL-HEQGKGI  | 958  |
| AcrB | 901 | VMLVVPLGVIGALLA + RGL+NDV+FQVGLLTTIGLSAKNAILIVEFAK+L ++GKG+   | 960  |
| MexB | 959 | VEAAIEACRMRLRPIVMTSLAFILGVVPLAISTGAGSGSQHAIGTGVIGGMVTATVLAI   | 1017 |
| AcrB | 961 | +EA +++ RMRLRPI+MTSLAFILGV+PL ISTGAGSG+Q+A+GTGV+GGMVTATVLAI   | 1019 |

### Supplementary Figure 1. Alignment of *E. coli* AcrB and *P. aeruginosa* MexB.

Alignment of *Escherichia coli* AcrB (Ref. NP\_414995.1) and *Pseudomonas aeruginosa*

MexB (Ref. NP\_249117.1) by BLAST. Identity 71%, positives 84%, Gaps 0%.

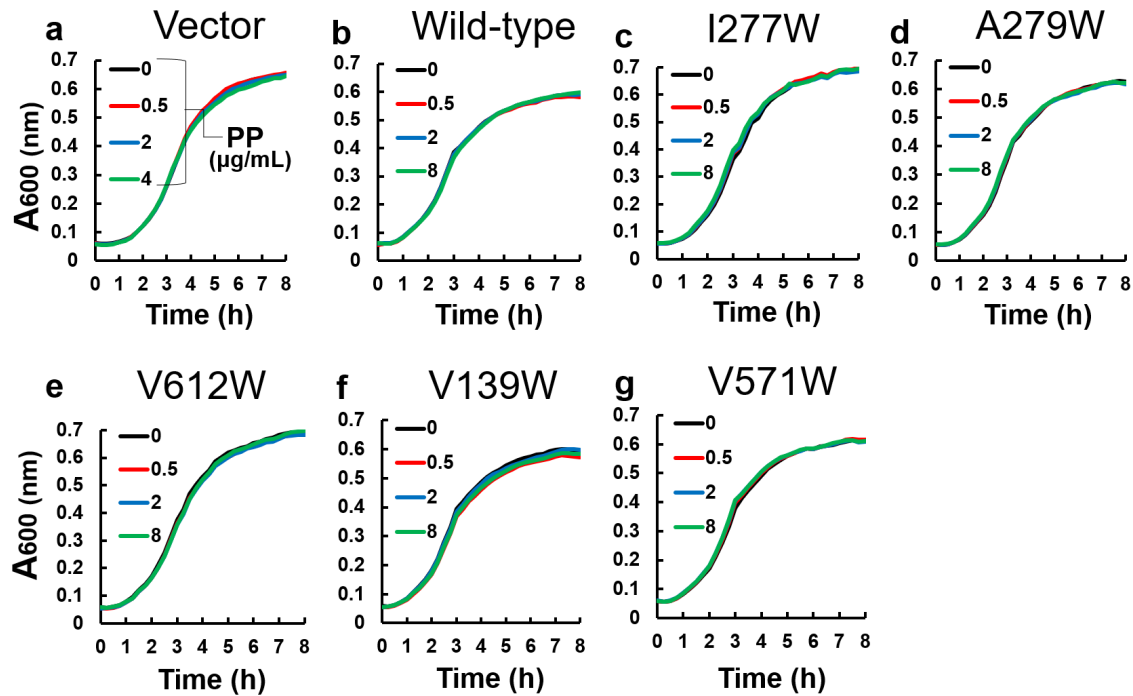

**Supplementary Figure 2. Growth of *Escherichia coli* cells in the presence of various concentrations of ABI-PP without antibiotics**

**a** The growth of *E. coli* MG1655 $\Delta$ *acrB* $\Delta$ *tolC* cell harbouring the plasmid pMMB67HE in the presence of various concentrations of ABI-PP without antibiotics. **b-g** The growth of *E. coli* MG1655 $\Delta$ *acrB* $\Delta$ *tolC* cells expressing wild-type MexB (**b**), MexB(I277W) (**c**), MexB(A279W) (**d**), MexB(V612W) (**e**), MexB(V139W) (**f**) and MexB(V571W) (**g**) in the presence of various concentrations of ABI-PP without antibiotics. These tests were performed in triplicates. Abbreviations: PP, ABI-PP inhibitor.

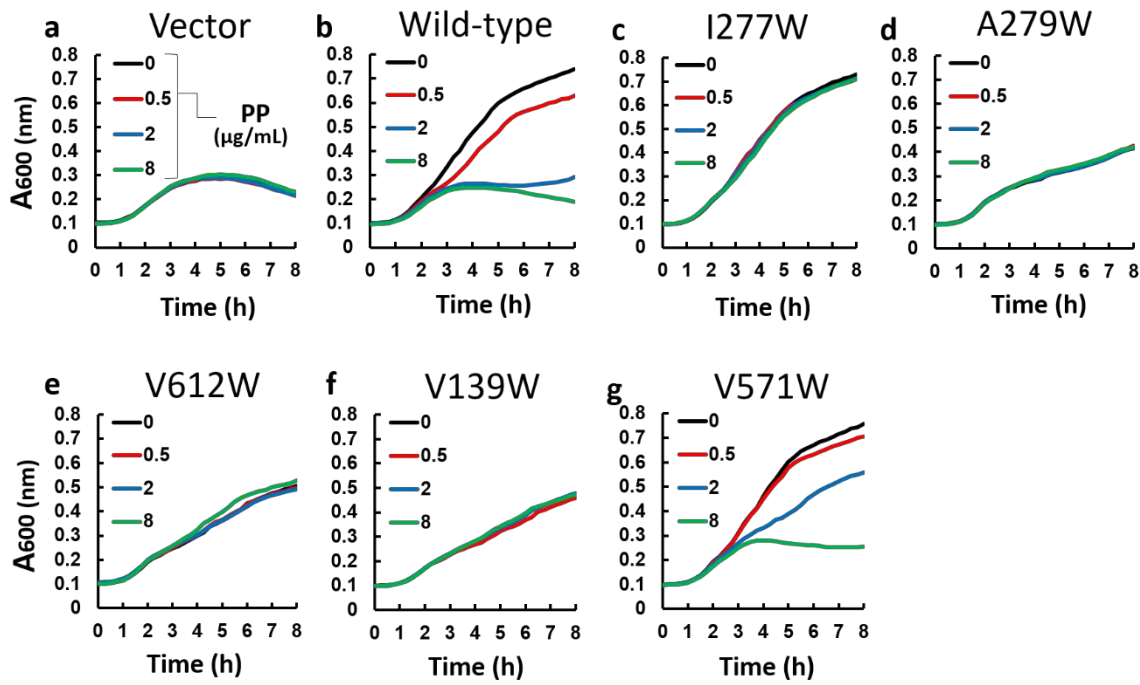

**Supplementary Figure 3. Growth of *Escherichia coli* cells in the presence of 0.016 µg/mL of levofloxacin and various concentrations of ABI-PP**

**a** The growth of *E. coli* MG1655 $\Delta$ *acrB* $\Delta$ *tolC* cell harbouring the plasmid pMMB67HE in the presence of 0.016 µg/mL of levofloxacin and various concentrations of ABI-PP. **b-g** The growth of *E. coli* MG1655 $\Delta$ *acrB* $\Delta$ *tolC* cells expressing wild-type MexB (b), MexB(I277W) (c), MexB(A279W) (d), MexB(V612W) (e), MexB(V139W) (f) and MexB(V571W) (g) in the presence of 0.016 µg/mL of levofloxacin and various concentrations of ABI-PP. These tests were performed in triplicates. Abbreviations: PP, ABI-PP inhibitor.

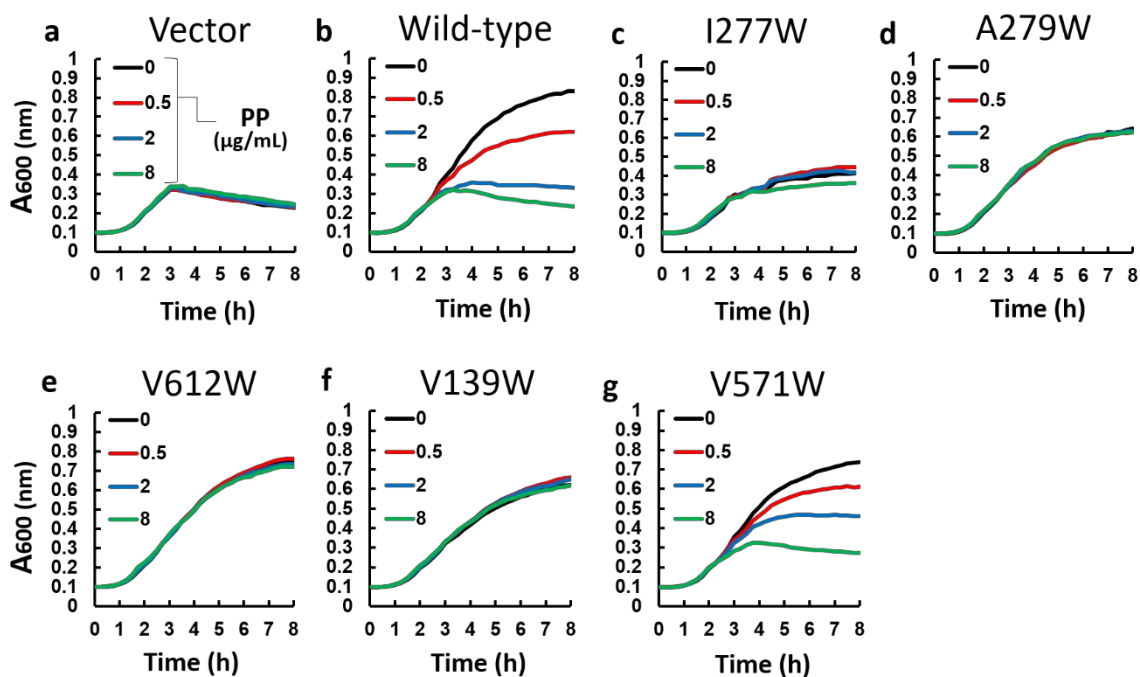

**Supplementary Figure 4. Growth of *Escherichia coli* cells in the presence of 0.125 µg/mL of aztreonam and various concentrations of ABI-PP**

**a** The growth of *E. coli* MG1655 $\Delta$ *acrB* $\Delta$ *tolC* cell harbouring the plasmid pMMB67HE in the presence of 0.125 µg/mL of aztreonam and various concentrations of ABI-PP. **b-g** The growth of *E. coli* MG1655 $\Delta$ *acrB* $\Delta$ *tolC* cells expressing wild-type MexB (b), MexB(I277W) (c), MexB(A279W) (d), MexB(V612W) (e), MexB(V139W) (f) and MexB(V571W) (g) in the presence of 0.125 µg/mL of aztreonam and various concentrations of ABI-PP. These tests were performed in triplicates. Abbreviations: PP, ABI-PP inhibitor.
